# Supplementary material for: The Relationship between Post-Traumatic Stress Disorder Due to Brain Injury and Glutamate Intake: A Systematic Review
Source: MDPI journal article supplement (doi:10.3390/nu16060901), 2024-03-21
Supplement: s1 [file s1]

**Table S1.** Prevalence of post-TBI PTSD in Asian countries (rich-glutamate diets) vs. non-Asian countries (poor-glutamate diets).

| Study                          | Population  | Participant (n)  |                      | %            | Reference |
|--------------------------------|-------------|------------------|----------------------|--------------|-----------|
|                                |             | TBI Total Causes | Post-TBI PTSD Causes |              |           |
| Marks MR, et al. 2022          | USA         | 207354           | 1232                 | 0.59%        | [140]     |
| Albrecht JS, et al. 2017       | USA         | 96881            | 269                  | 0.28%        | [141]     |
| van der Vlegel M, 2021         | EU          | 2864             | 153                  | 5.34%        | [141]     |
| Zatzick DF, et al. 2010        | USA         | 2228             | 485                  | 21.77%       | [143]     |
| Bockhop F, et al. 2022         | Germany     | 1776             | 190                  | 10.70%       | [144]     |
| Kulbe JR, et al. 2022          | USA         | 1143             | 227                  | 19.86%       | [145]     |
| Van Praag DL, et al. 2022      | EU          | 1134             | 153                  | 13.49%       | [146]     |
| Haagsma JA, et al. 2015        | Netherlands | 797              | 42                   | 5.27%        | [147]     |
| Stein MB, et al. 2019          | USA         | 750              | 129                  | 17.20%       | [18]      |
| Stein MB, et al. 2023          | USA         | 714              | 116                  | 16.25%       | [148]     |
| Lagarde E, et al. 2014         | France      | 534              | 47                   | 8.80%        | [149]     |
| Kosaraju S, et al. 2022        | USA         | 504              | 89                   | 17.66%       | [150]     |
| Bryant RA, et al. 2009         | Australia   | 425              | 50                   | 11.76%       | [151]     |
| Stein MB, et al. 2021          | USA         | 421              | 70                   | 16.63%       | [152]     |
| Creamer M, et al. 2005         | Australia   | 307              | 32                   | 10.42%       | [153]     |
| Haarbauer-Krupa J, et al. 2017 | USA         | 280              | 75                   | 26.79%       | [135]     |
| Scheenen ME, et al. 2017       | Netherlands | 262              | 32                   | 12.21%       | [154]     |
| Hoffman JM, et al. 2012        | USA         | 239              | 41                   | 17.15%       | [155]     |
| Warren AM, et al. 2015         | USA         | 231              | 41                   | 17.75%       | [156]     |
| Sawyer K, et al. 2015          | USA         | 186              | 25                   | 13.44%       | [157]     |
| Alway Y, et al. 2016           | Australia   | 149              | 14                   | 9.40%        | [158]     |
| Qureshi KL, et al. 2019        | UK          | 127              | 26                   | 20.47%       | [159]     |
| Bombardier CH, et al. 2006     | USA         | 125              | 14                   | 11.20%       | [160]     |
| Gil S, et al. 2005             | Israel      | 120              | 17                   | 14.17%       | [161]     |
| Caspi Y, et al. 2005           | Israel      | 120              | 22                   | 18.33%       | [162]     |
| Hickling EJ, et al. 1998       | USA         | 107              | 38                   | 35.51%       | [163]     |
| Bryant RA, et al. 2000         | Australia   | 96               | 26                   | 27.08%       | [41]      |
| Winkler EA, et al. 2017        | USA         | 96               | 28                   | 29.17%       | [164]     |
| Alway Y, et al. 2016           | Australia   | 85               | 10                   | 11.76%       | [165]     |
| Levin HS, et al. 2001          | USA         | 69               | 8                    | 11.59%       | [166]     |
| Bryant RA, et al. 2004         | Australia   | 68               | 16                   | 23.53%       | [167]     |
| Williams WH, et al. 2002       | UK          | 66               | 12                   | 18.18%       | [168]     |
| Sumpter RE, et al. 2005        | USA         | 66               | 17                   | 25.76%       | [169]     |
| Bryant RA, et al. 1998         | Australia   | 63               | 15                   | 23.81%       | [43]      |
| Jones C, et al. 2005           | UK          | 58               | 10                   | 17.24%       | [170]     |
| Bryant RA, et al. 1999         | Australia   | 46               | 9                    | 19.57%       | [171]     |
| Glaesser J, et al. 2004        | Germany     | 46               | 5                    | 10.87%       | [50]      |
| Sumpter RE, et al. 2006        | UK          | 34               | 1                    | 2.94%        | [49]      |
| Roden-Foreman K, et al. 2017   | USA         | 28               | 11                   | 39.29%       | [172]     |
| Ohry A, et al. 1996            | USA         | 24               | 8                    | 33.33%       | [173]     |
| <b>Total</b>                   |             | <b>320,623</b>   | <b>3805</b>          | <b>1.19%</b> |           |

**Table S2.** Prevalence of post-TBI PTSD in no Asian countries.

| Study                    | Population | Participant (n)  |                      | %             | Reference |
|--------------------------|------------|------------------|----------------------|---------------|-----------|
|                          |            | TBI Total Causes | Post-TBI PTSD Causes |               |           |
| Sudhakar SK, et al. 2023 | India      | 224              | 25                   | 11.16%        | [174]     |
| Zaman S, et al. 2020     | Pakistan   | 96               | 19                   | 19.79%        | [175]     |
| Choi MS, et al. 2014     | Korea      | 71               | 2                    | 2.82%         | [176]     |
| Li L, et al. 2016        | China      | 43               | 21                   | 48.84%        | [177]     |
| <b>Total</b>             |            | <b>434</b>       | <b>67</b>            | <b>15.44%</b> |           |

**Table S3.** Prevalence of post-TBI PTSD in Asian countries.

|                                                | Event (PTSD) | No Event |
|------------------------------------------------|--------------|----------|
| Population post-TBI PTSD in Asian countries    | <b>a</b>     | <b>b</b> |
| Population post-TBI PTSD in no Asian countries | <b>c</b>     | <b>d</b> |

We calculated the confidence Interval and the odds ratio using the following formulas.

- **Odds ratio** =  $(a*d)/(b*c)$
- **Lower 95% CI** =  $e^{\ln(OR) - 1.96\sqrt{(1/a + 1/b + 1/c + 1/d)}}$
- **Upper 95% CI** =  $e^{\ln(OR) + 1.96\sqrt{(1/a + 1/b + 1/c + 1/d)}}$

whereas in the publication the data were presented as a percentage of the number of cases, we recalculated and presented the data as an odds ratio.

Odds ratio was calculated as previously described [33,38].
